# Supplementary material for: Delineating the Role of Aedes aegypti ABC Transporter Gene Family during Mosquito Development and Arboviral Infection via Transcriptome Analyses
Source: MDPI journal article supplement (doi:10.3390/pathogens10091127), 2021-09-02
Supplement: s1 [file s1]

**Supplementary Table S1.** List of primers used for qPCR to validate the ABC transporter genes expression during mosquito development and post-arboviral infection (as mentioned in materials and methods Sections 4.5–4.6).

| Gene Name        | Forward primer        | Reverse primer         | Source        |
|------------------|-----------------------|------------------------|---------------|
| <i>AaeABCC9</i>  | CTTCCCAGACGAACAGCCTA  | CCTTGACAATGACCGGCAAA   | Present study |
| <i>AaeABCC13</i> | TTGCTCTCGATTACCTGGGG  | ACACGATGTCTCCCTTCTGG   |               |
| <i>AaeABCE1</i>  | AGGAGAACTGCAGCGTTTTG  | TCATCCGGCTCCAGATTACC   |               |
| <i>AaeABCF2</i>  | CCAGTGC GTTATGGAAGTCG | GCAAGCGTCCAAATCGAGAT   |               |
| <i>AaeABCG11</i> | TGACGGTGCTGGAGAATATG  | CGTAGAGGCCAAGTACAGTTAG |               |
| <i>AaeABCG13</i> | GAAACGATCGCCATGCAAAC  | ACGATACAGGTCAGCAGGAG   |               |
| <i>AaeActin</i>  | GAACACCCAGTCCTGCTGACA | TGCGTCATCTTCTCACGGTTAG | [65]          |
| <i>AaeS6</i>     | CGTCGTCAGGAACGTATCCG  | TCTTGGCAGCCTTAGCAGC    | [56]          |

**Supplementary Table S2.** List of immunity related transcription factors identified in the 5' UTR sequences of representative ABC transporters and their functions [67].

| Transcription Factor | Functions of Transcription factor                                                                                                               |
|----------------------|-------------------------------------------------------------------------------------------------------------------------------------------------|
| Rel                  | Innate immune response, Toll signaling pathway                                                                                                  |
| STAT                 | Defense response, The Janus kinase-STAT pathway is also connected to insect early development                                                   |
| Ets21C               | Defense response to bacterium                                                                                                                   |
| Bgb                  | Regulation of hemocyte proliferation                                                                                                            |
| Cnc                  | Response to oxidative stress                                                                                                                    |
| Schlank (Sch)        | SREBP signaling pathway, a sterol response element-binding transcription factor (SREBP) to result in up-regulation of target gene transcription |
